# Supplementary material
Source: PubMed Central journal article supplement (PMC4696543)
Supplement: NIHMS724954-supplement-01.pdf [file NIHMS724954-supplement-01.pdf]

| Supplementary Table 1. Basic characteristics of the twin cohorts participating in the CODATwins project. |                            |              |                               |               |                 |           |               |                                                         |                |                            |                                       |
|----------------------------------------------------------------------------------------------------------|----------------------------|--------------|-------------------------------|---------------|-----------------|-----------|---------------|---------------------------------------------------------|----------------|----------------------------|---------------------------------------|
| Cohort name                                                                                              | Number of twin individuals | % of females | Number of complete twin pairs | % of MZ pairs | % of OSDZ pairs | Age range | Birth cohorts | Identification of twin pairs                            | Zygoty measure | Height and weight measures | Birth anthropometric measures         |
| <b>Africa</b>                                                                                            |                            |              |                               |               |                 |           |               |                                                         |                |                            |                                       |
| Guinea-Bissau Twin Study                                                                                 | 253                        | 53           | 108                           | 15            | 58              | 0-3       | 2009-2013     | Hospitals, demographic surveillance sites               | Q              | Measured                   | Measured length and weight            |
| <b>Australia</b>                                                                                         |                            |              |                               |               |                 |           |               |                                                         |                |                            |                                       |
| Australian Twin Registry                                                                                 | 2,536                      | 78           | 1,210                         | 72            | 9               | 18-97     | 1916-1996     | Media, Australian Multiple Birth Association, hospitals | DNA and Q      | Self-reported              | Self-reported weight                  |
| Peri/Postnatal Epigenetic Twins Study (PETS)                                                             | 443                        | 53           | 221                           | 41            | 26              | 1-7       | 2007-2009     | Twin pregnancies in three hospitals                     | DNA            | Measured                   | Measured lengths and weight           |
| Queensland Twin Register                                                                                 | 23,456                     | 59           | 10,685                        | 44            | 24              | 6-95      | 1900-2002     | Birth records                                           | DNA and Q      | Measured and self-reported | NA                                    |
| <b>East-Asia</b>                                                                                         |                            |              |                               |               |                 |           |               |                                                         |                |                            |                                       |
| Guangzhou Twin Eye Study                                                                                 | 1,122                      | 52           | 561                           | 63            | 19              | 6-19      | 1990-2002     | Population registry                                     | DNA and Q      | Measured                   | NA                                    |
| Japanese Twin Cohort                                                                                     | 4,341                      | 51           | 2,169                         | 62            | 15              | 1-12      | 1950-2003     | High school applicants                                  | Q              | Parentally reported        | Parentally reported length and weight |
| Korean Twin-Family Register                                                                              | 1,353                      | 62           | 672                           | 82            | 0               | 20-79     | 1934-1990     | Population registry                                     | DNA and Q      | Measured                   | NA                                    |

|                                                            |       |    |       |    |    |        |           |                                                          |                    |                            |                                       |
|------------------------------------------------------------|-------|----|-------|----|----|--------|-----------|----------------------------------------------------------|--------------------|----------------------------|---------------------------------------|
| Mongolian Twin Registry                                    | 166   | 49 | 83    | 43 | 22 | 0- 65  | 1948-2012 | Birth records                                            | Q                  | Self-reported              | Self-reported length and weight       |
| Osaka University Aged Twin Registry                        | 689   | 60 | 288   | 61 | 5  | 20- 98 | 1915-1993 | School records                                           | DNA and Q          | Self-reported              | NA                                    |
| South Korea Twin Registry                                  | 2,278 | 54 | 1,139 | 59 | 20 | 7-26   | 1983-2003 | Schools, hospitals, media and childcare agencies         | Q                  | Self-reported              | NA                                    |
| Qingdao Twin Registry (adults)                             | 986   | 51 | 493   | 61 | 20 | 23-81  | 1925-1984 | Medical records, schools and media                       | DNA and blood type | Measured                   | NA                                    |
| Qingdao Twin Registry (children)                           | 1,175 | 52 | 587   | 53 | 20 | 8-17   | 1989-1998 | Medical records, schools and media                       | DNA and blood type | Measured                   | Parentally reported length and weight |
| West Japan Twins and Higher Order Multiple Births Registry | 1,552 | 53 | 767   | 53 | 25 | 0-45   | 1964-2013 | Contacting public health centers                         | Q                  | Parentally reported        | Parentally reported length and weight |
| <b>Europe</b>                                              |       |    |       |    |    |        |           |                                                          |                    |                            |                                       |
| Adult Netherlands Twin Registry                            | 9,645 | 64 | 4,786 | 50 | 22 | 18-91  | 1918-1994 | City council registers, media, websites and social media | DNA and Q          | Measured and self-reported | Self-report birth weight              |
| Berlin Twin Register                                       | 614   | 58 | 307   | 66 | 12 | 10-78  | 1925-1990 | Media                                                    | DNA and Q          | Self-reported              | NA                                    |

|                                             |        |    |        |    |    |        |           |                                                                   |                             |                            |                                       |
|---------------------------------------------|--------|----|--------|----|----|--------|-----------|-------------------------------------------------------------------|-----------------------------|----------------------------|---------------------------------------|
| Bielefeld Longitudinal Study of Adult Twins | 2,366  | 75 | 1,088  | 66 | 10 | 14-80  | 1914-1980 | Registration offices, media, twin clubs                           | Q                           | Self-reported              | NA                                    |
| Danish Twin Cohort                          | 34,665 | 54 | 11,667 | 29 | 31 | 30-100 | 1895-1982 | Birth registers, population registers and medical birth registers | Q                           | DNA and Q                  | NA                                    |
| East Flanders Prospective Twin Survey       | 803    | 52 | 379    | 64 | 11 | 18-34  | 1964-1982 | Birth records                                                     | Chorionicity, blood and DNA | Measured                   | Measured weight                       |
| Finnish Older Twin Cohort                   | 29,568 | 51 | 13,422 | 28 | 11 | 18-101 | 1880-1957 | Birth records                                                     | Q                           | Self-reported              | NA                                    |
| FinnTwin12                                  | 4,954  | 50 | 2,467  | 34 | 33 | 10-27  | 1983-1987 | Birth records                                                     | Q                           | Self-reported              | Parentally reported length and weight |
| FinnTwin16                                  | 5,701  | 52 | 2,846  | 32 | 35 | 16-37  | 1974-1979 | Birth records                                                     | Q                           | Self-reported              | Parentally reported length and weight |
| Gemini Study                                | 3,495  | 51 | 1,737  | 33 | 33 | 0-5    | 2007      | Birth records                                                     | DNA and Q                   | Measured                   | Parentally reported length and weight |
| Genesis 12-19 study                         | 1,662  | 55 | 747    | 36 | 33 | 13-28  | 1985-1988 | Birth records                                                     | DNA and Q                   | Self-reported              | NA                                    |
| Hungarian Twin Registry                     | 825    | 65 | 389    | 59 | 13 | 2-82   | 1927-2012 | Twin festivals, media                                             | DNA and Q                   | Measured                   | Self-reported weight                  |
| Italian Twin Registry                       | 17,361 | 56 | 7,432  | 44 | 25 | 1-90   | 1917-2007 | Municipality records, disease registries and hospitals            | DNA and Q                   | Measured and self-reported | Parentally reported length and weight |

|                                           |        |    |        |    |    |        |           |                                           |           |                              |                                       |
|-------------------------------------------|--------|----|--------|----|----|--------|-----------|-------------------------------------------|-----------|------------------------------|---------------------------------------|
| Murcia Twin Registry                      | 2,258  | 57 | 999    | 35 | 27 | 41-71  | 1939-1966 | Health records                            | DNA and Q | Measured and self-reported   | Self-reported weight                  |
| Norwegian Twin Registry                   | 13,941 | 53 | 5,254  | 46 | 0  | 20-75  | 1915-1960 | Birth records                             | Q         | Self-reported                | Self-reported weight                  |
| Portugal Twin Cohort                      | 1,789  | 50 | 803    | 42 | 23 | 3-20   | 1982-2004 | Schools, media, city halls, twin meetings | DNA and Q | Measured                     | NA                                    |
| Swedish twin cohorts                      | 65,995 | 53 | 29,820 | 31 | 19 | 14- 99 | 1886-1958 | Birth records                             | Q         | Self-reported                | NA                                    |
| Swedish Young Male Twins Study (adults)   | 2,151  | 0  | 1,074  | 57 | 0  | 17-29  | 1973-1979 | Birth records                             | Q         | Self-reported                | Measured length and weight            |
| Swedish Young Male Twins Study (children) | 898    | 0  | 352    | 63 | 0  | 0- 23  | 1973-1979 | Birth records                             | Q         | Measured                     | Measured length and weight            |
| TCHAD-study                               | 2,570  | 52 | 1,265  | 40 | 30 | 7- 21  | 1976-1978 | Birth records                             | Q         | Parentally and self-reported | NA                                    |
| Twins Early Development Study             | 18,354 | 51 | 9,065  | 34 | 33 | 2- 17  | 1994-1996 | Birth records                             | DNA and Q | Parentally and self-reported | Parentally reported length and weight |
| TwinsUK                                   | 9,034  | 88 | 4,316  | 51 | 1  | 18-88  | 1917-1990 | media, websites and social media          | DNA and Q | Measured and self-reported   | NA                                    |

|                                               |        |    |        |    |    |        |           |                                                                                         |           |                            |                                                                            |
|-----------------------------------------------|--------|----|--------|----|----|--------|-----------|-----------------------------------------------------------------------------------------|-----------|----------------------------|----------------------------------------------------------------------------|
| Young Netherlands Twin Registry               | 34,524 | 50 | 17,237 | 33 | 33 | 1-20   | 1986-2005 | Association of parents of multiples, commercial organizations websites and social media | DNA and Q | Parental and self-reported | Parentally reported length and weight as assessed by obstetrician/mid wife |
| <b>South-Asia and Middle-East</b>             |        |    |        |    |    |        |           |                                                                                         |           |                            |                                                                            |
| Longitudinal Israeli Study of Twins           | 995    | 49 | 489    | 23 | 36 | 3-10   | 2003-2007 | Birth records                                                                           | DNA and Q | Measured                   | NA                                                                         |
| Sri Lanka Twin Registry                       | 2,485  | 56 | 933    | 45 | 27 | 20-88  | 1925-1993 | Door-to-door visit survey, newsletters, cultural activities, media, birth records       | DNA and Q | Self-reported              | NA                                                                         |
| Turkish Twin Study                            | 584    | 46 | 288    | 37 | 27 | 14- 69 | 1942-1996 | Birth records                                                                           | Q         | Self-reported              | NA                                                                         |
| <b>North-America</b>                          |        |    |        |    |    |        |           |                                                                                         |           |                            |                                                                            |
| Boston University Twin Project                | 627    | 47 | 313    | 46 | 0  | 2-3    | 2001-2004 | Birth records                                                                           | DNA       | Measured                   | Parentally reported length and weight                                      |
| California Twin Program                       | 27,237 | 58 | 13,384 | 39 | 26 | 17-91  | 1908-1982 | Birth records                                                                           | Q         | Self-reported              | NA                                                                         |
| Carolina African American Twin Study of Aging | 532    | 59 | 249    | 35 | 27 | 22-88  | 1910-1979 | Birth records                                                                           | DNA and Q | Measured                   | Self-reported weight                                                       |
| Colorado Twin Registry                        | 2,861  | 48 | 1,421  | 48 | 19 | 11-29  | 1979-1991 | Birth records                                                                           | DNA and Q | Measured                   | Measured weight                                                            |
| Michigan State University Twin                | 22,172 | 49 | 10,253 | 30 | 34 | 2-51   | 1961-2010 | Birth records                                                                           | DNA and Q | Parentally and self-       | Parentally and self-reported                                               |

| Registry                                     |        |    |        |    |    |       |           |                                              |           | reported;<br>Measured            | weight                                |
|----------------------------------------------|--------|----|--------|----|----|-------|-----------|----------------------------------------------|-----------|----------------------------------|---------------------------------------|
| Mid Atlantic Twin Registry                   | 11,801 | 65 | 5,743  | 46 | 23 | 16-93 | 1894-1987 | Birth records, schools, hospitals and events | DNA and Q | Self-reported                    | NA                                    |
| Minnesota Twin Family Study                  | 1,511  | 50 | 755    | 64 | 0  | 10-19 | 1972-1984 | Birth records                                | DNA       | Measured                         | Parentally reported weight            |
| Minnesota Twin Registry                      | 10,122 | 55 | 3,998  | 40 | 23 | 26-63 | 1923-1958 | Birth records                                | Q         | Self-reported                    | Weight based on birth certificate     |
| NAS-NRC Twin Registry                        | 27,093 | 0  | 13,540 | 44 | 0  | 15-82 | 1917-1927 | Birth records                                | Q and DNA | Measured and self-reported       | NA                                    |
| Quebec Newborn Twin Study                    | 1,342  | 50 | 668    | 38 | 30 | 0-14  | 1997-1997 | Birth records                                | DNA and Q | Measured and parentally reported | Measured length and weight            |
| SRI-international                            | 1,092  | 70 | 539    | 75 | 8  | 17-83 | 1921-1997 | Community based advertising                  | Q         | Measured and self-reported       | NA                                    |
| Texas Twin Project                           | 565    | 51 | 282    | 35 | 30 | 8-20  | 1991-2003 | Schools                                      | Q         | Self-reported                    | NA                                    |
| University of British Columbia Twin Project  | 1,450  | 67 | 719    | 53 | 13 | 15-86 | 1905-1976 | Media                                        | Q         | Self-reported                    | NA                                    |
| University of Southern California Twin Study | 1,541  | 50 | 770    | 44 | 26 | 9-22  | 1990-1995 | Schools, birth and voter records             | DNA and Q | Measured                         | Parentally reported length and weight |
| University of Washington Twin Registry       | 15,940 | 61 | 7,921  | 53 | 22 | 18-97 | 1914-1995 | The Washington State Department              | DNA and Q | Self-reported                    | NA                                    |

|                                 |       |   |     |    |   |       |           |                                                                   |           |          |    |
|---------------------------------|-------|---|-----|----|---|-------|-----------|-------------------------------------------------------------------|-----------|----------|----|
|                                 |       |   |     |    |   |       |           | of Licensing application system                                   |           |          |    |
| Vietnam Era Twin Study of Aging | 1,237 | 0 | 614 | 57 | 0 | 51-67 | 1943-1955 | Department of Defense and Department of Veteran Affairs databases | DNA and Q | Measured | NA |

Q=questionnaire; MZ=monozygotic; OSDZ=opposite-sex dizygotic
